# Supplementary material for: Orange-red and white-emitting nonconventional luminescent polymers containing cyclic acid anhydride and lactam groups
Source: Royal Society of Chemistry journal article supplement (doi:10.1039/c9tc05948b), 2019-12-09
Supplement: c9tc05948b1.pdf [file c9tc05948b1.pdf]

## Supporting Information

### Orange-red and White-Emitting Nonconventional Luminescent Polymers Containing Cyclic Acid Anhydride and Lactam Groups

Cong Shang, Yaxin Zhao, Jiayu Long, Ying Ji, Huiliang Wang\*

Beijing Key Laboratory of Energy Conversion and Storage Materials,

College of Chemistry, Beijing Normal University, Beijing 100875, P. R. China.

\*Corresponding author: wanghl@bnu.edu.cn

#### Supporting Figures

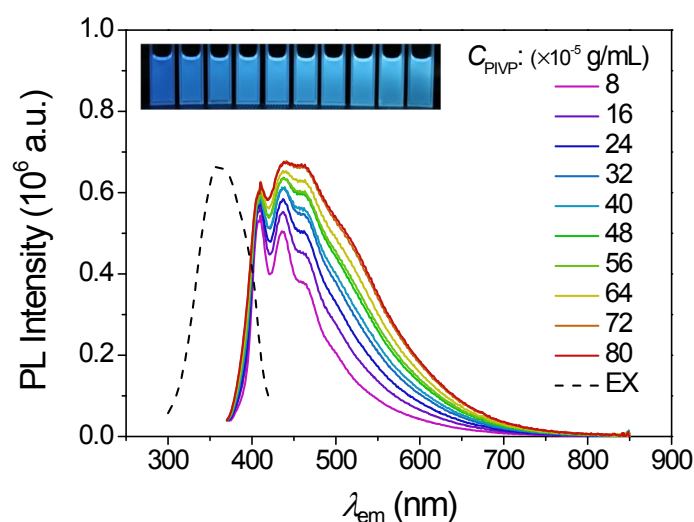

Figure S1. PL excitation (dashed line) and emission (solid line) spectra of PIVP DMSO solutions with different copolymer concentrations. The excitation wavelengths ( $\lambda_{ex}$ ) was 360 nm. The insets show the photographs of the solutions (increasing concentration from left to right) under 365 nm UV light.

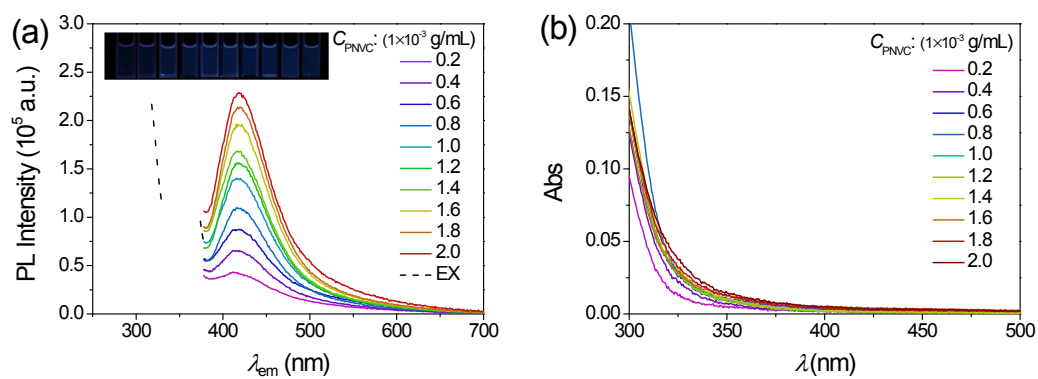

Figure S2. PL excitation (dashed line) and emission (solid line) spectra (a) and UV-vis spectra (b) of PNVC DMSO solutions with different copolymer concentrations. The excitation wavelengths ( $\lambda_{\text{ex}}$ ) for PNVC was 313 nm. The insets in (a) show the photographs of the solutions (increasing concentration from left to right) under 365 nm UV light.

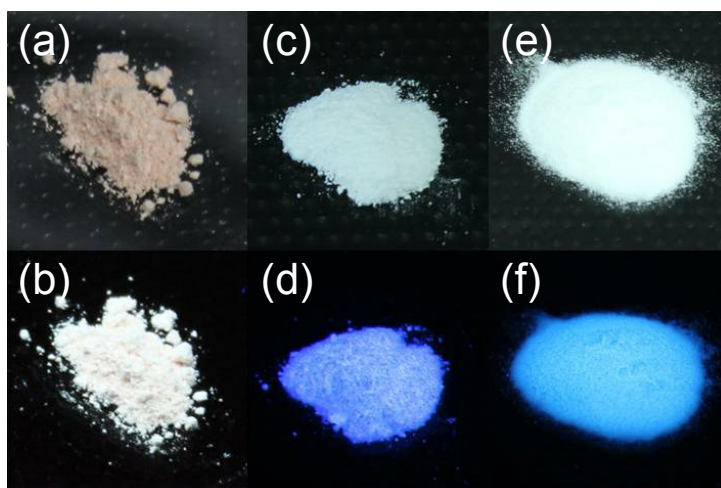

Figure S3. Photographs of PIVP (a, b), PITA (c, d) and PVP (e, f) solid powders under natural light (a, c, e) and 365 nm UV light (b, d, f).
